# Supplementary material
Source: PubMed Central journal article supplement (PMC4394820)
Supplement: AAC.04408-14_zac005153938so1.pdf [file AAC.04408-14_zac005153938so1.pdf]

**Supplementary Table S1. List of oligonucleotide primers**

| Primer name    | Sequence (5'→3')          | Annealing temperature | Reference                                                                          |
|----------------|---------------------------|-----------------------|------------------------------------------------------------------------------------|
| CMY-2-F        | AACACACTGATTGCGTCTGAC     | 55°C                  | Jørgensen et al.; JAC. 2010 Mar; 65(3):460-4. doi: 10.1093/jac/dkp484              |
| CMY-2-R        | CTGGGCCTCATCGTCAGTTA      |                       |                                                                                    |
| CMY-2_IntF     | AAGCGCAATGCCCTGCTG        |                       |                                                                                    |
| CMY-2_IntF1    | ACAACCTTGACGCCGAAGC       |                       |                                                                                    |
| CTXMGr1-Fout   | GTTGTTGTTAWTTCGTMCTTCCAGA | 55°C                  | Vogt et al.; MDR. 2014 Oct;20(5):485-94. doi: 10.1089/mdr.2013.0210.               |
| CTXMGr1-Rout   | TTCCCCATTCCGTTTCCG        |                       |                                                                                    |
| CTXMGr1-FinSeq | CGCGTGATACCACTTCAC        |                       |                                                                                    |
| CTXMGr1-RinSeq | CCGACTGCCGCTCTAATT        |                       |                                                                                    |
| CTXM914F       | GCTGGAGAAAAGCAGCGGAG      | 54°C                  | Pitout et al., JCM. 2004 Dec;42(12):5715-21. doi: 10.1128/JCM.42.12.5715-5721.2004 |
| CTXM914R       | GTAAGCTGACGCAACGTCTG      |                       |                                                                                    |
| DHA-1_fwd      | GCGGTTTCTGTGGCGAAAAA      | 55°C                  | This study                                                                         |
| DHA-1_rev      | CGTACGCATACTGGCTTTGC      |                       |                                                                                    |
| LAP F          | CAATACAAAGCACAGAAGACC     | 54°C                  | Poirel et al. AAC. 2007 Feb;51(2): 01082-06. doi:10.1128/AAC.01082-06              |
| LAP R          | CCGATCCCTGCAATATGCTC      |                       |                                                                                    |
| NDM-Fm         | GGTTTGGCGATCTGGTTTTTC     | 54°C                  | Poirel et al., AAC. 2011 Feb; 55(2): 934-6. doi: 10.1128/AAC.01247-10              |
| NDM-Rm         | CGGAATGGCTCATCACGATC      |                       |                                                                                    |
| OXA-48-F       | TTGGTGGCATCGATTATCGG      | 55°C                  | Queenan et al., CMI. 2007 Jul; 2007 Jul;20(3):440-58. doi:10.1128/CMR.00001-07     |
| OXA-48-R       | GAGCACTTCTTTTGTGATGGC     |                       |                                                                                    |
| OXA-1A         | TCAACTTTCAAGATCGCA        | 55°C                  | Poirel et al., AAC. 2004 Jan; 48(1):15-22. doi:10.1128/AAC.48.1.15-22.2004         |
| OXA-1B         | GTGTGTTTAGAATGGTGA        |                       |                                                                                    |
| oxa9_fwd       | TGGAATCTTGCAGTCGCCAA      | 54°C                  | This study                                                                         |
| oxa9_rev       | TATGCGCGACAAAGCGTAGA      |                       |                                                                                    |
| SHV-F          | ATTTGTGCGTTCTTTACTCGC     | 54°C                  | Szabó et al., JCM. 2005 Oct;43(10):5058-64. doi:10.1128/JCM.43.10.5058-5064.2005   |
| SHV-R          | TTTATGGCGTTACCTTTGACC     |                       |                                                                                    |
| SHV-SeqF       | GAGGCGCTTCCCGGCGAC        |                       |                                                                                    |
| SHV-SeqR       | CAAGGCGGGTGACGTTGTC       |                       |                                                                                    |
| TEM-F          | AGACGTCAGGTGGCACTTTTCGG   | 54°C                  | Hujer et al.; AAC. 2006 Dec; 50(12):4114-23.doi: 10.1128/AAC.00778-06              |
| TEM-R          | CAAGGGGTCTGACGCTCA        |                       |                                                                                    |
| gyrA-A         | CGCGTACTATACGCCATGAACGTA  | 50°C                  | Brisse et al.; AAC. 1999 Aug; 43(8):2051-55.                                       |
| gyrA-C         | ACCGTTGATCACTTCGGTCAGG    |                       |                                                                                    |
| parC-A         | CTGAATGCCAGCGCCAAATT      | 50°C                  | Brisse et al.; AAC. 1999 Aug; 43(8):2051-55.                                       |
| parC-C         | TGCGGTGGAATATCGGTTCGC     |                       |                                                                                    |
